# Supplementary material for: Characterization and Evaluation of HGF-Loaded PLGA Nanoparticles in a CCl4-Induced Acute Liver Injury Mouse Model
Source: Hindawi journal article supplement (doi:10.1155/2019/7936143), 2019-10-07

Supplementary Table 1 Properties of NPs

| NPs                    | Sample1 | Sample2 | Sample3 | average | SD    |
|------------------------|---------|---------|---------|---------|-------|
| Size (nm)              | 184.9   | 186.6   | 191.0   | 187.50  | 3.15  |
| polydispersity         | 0.199   | 0.180   | 0.202   | 0.194   | 0.012 |
| Zeta potential (mV)    | -44.5   | -42.9   | -42.0   | -43.13  | 1.27  |
| drug loading (%)       | 4.58    | 4.09    | 3.71    | 4.13    | 0.44  |
| loading efficiency (%) | 16.20   | 15.72   | 13.89   | 15.27   | 1.22  |

Supplementary Table 2 Properties of HGF-NPs-2 $\mu$ g

| HGF-NPs-2 $\mu$ g      | Sample1  | Sample2  | Sample3  | average  | SD       |
|------------------------|----------|----------|----------|----------|----------|
| Size (nm)              | 189.4    | 193.6    | 196.1    | 193.03   | 3.39     |
| polydispersity         | 0.230    | 0.223    | 0.230    | 0.228    | 0.004    |
| Zeta potential (mV)    | -47.8    | -47.2    | -47.4    | -47.47   | 0.31     |
| drug loading (%)       | 0.001159 | 0.001313 | 0.001332 | 0.001268 | 0.000095 |
| loading efficiency (%) | 10.26    | 12.28    | 12.79    | 11.78    | 1.34     |

Supplementary Table 3 Properties of HGF-NPs-4 $\mu$ g

| HGF-NPs-4 $\mu$ g      | Sample1  | Sample2  | Sample3  | average  | SD       |
|------------------------|----------|----------|----------|----------|----------|
| Size (nm)              | 188.5    | 196.7    | 194.5    | 193.2    | 4.24     |
| polydispersity         | 0.240    | 0.266    | 0.264    | 0.257    | 0.014    |
| Zeta potential (mV)    | -47.7    | -47.4    | -46.6    | -47.23   | 0.57     |
| drug loading (%)       | 0.002400 | 0.002385 | 0.002481 | 0.002422 | 0.000052 |
| loading efficiency (%) | 11.94    | 11.39    | 12.03    | 11.79    | 0.35     |

Supplementary Figure 1 Size of the nanoparticles by intensity

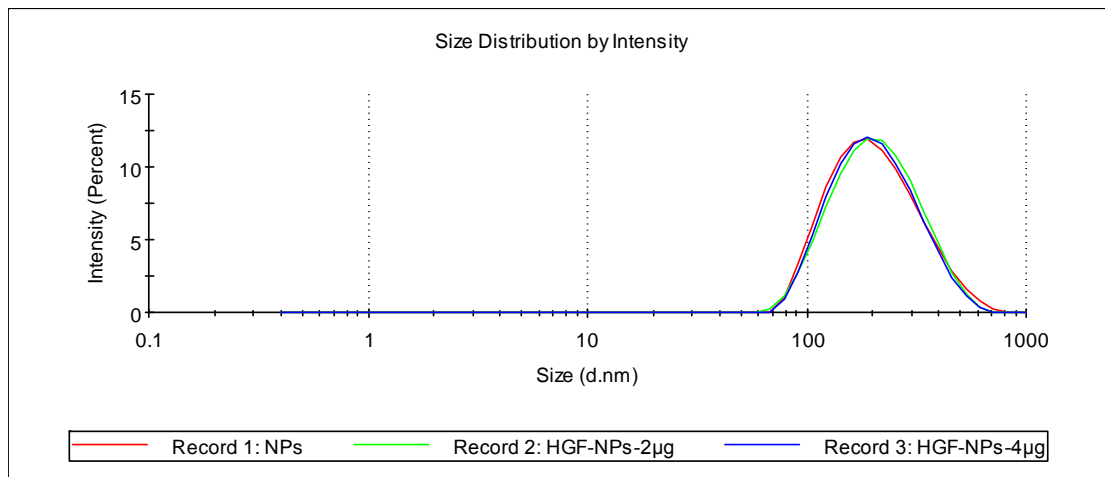

Supplementary Figure 2 Zeta potential of the nanoparticles

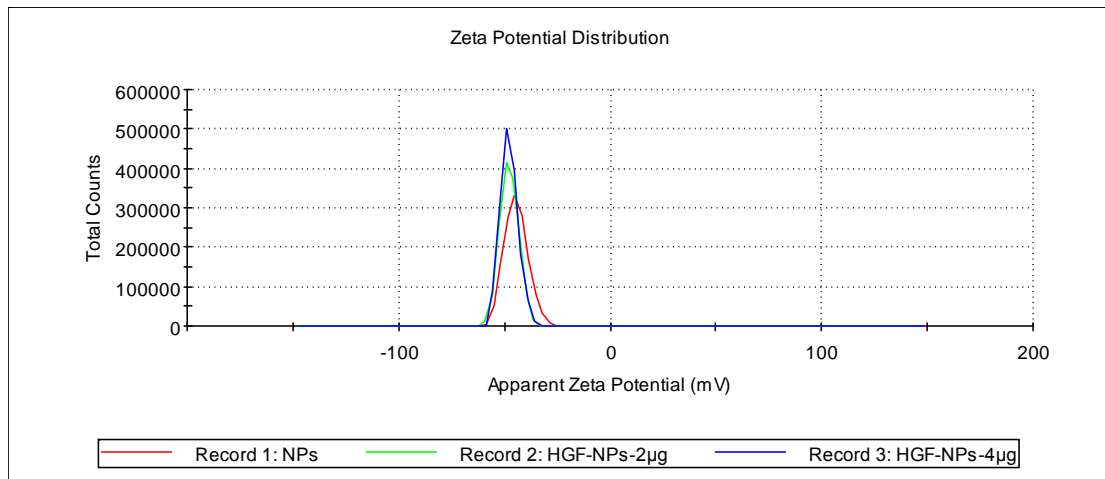

Supplement: f1 [file 7936143.f1.pdf]
